# Supplementary material for: Pressure-dependent optoelectronic properties of antiperovskite derivatives X3AsCl3 (X = Mg, Ca, Sr, Ba): a first-principles study
Source: Royal Society of Chemistry journal article supplement (doi:10.1039/d4cp03619k), 2025-01-01
Supplement: d4cp03619k2.pdf [file d4cp03619k2.pdf]

## Supporting Information

### Pressure-Dependent Optoelectronic Properties of Antiperovskite Derivatives $X_3AsCl_3$ (X = Mg, Ca, Sr, Ba): A First-Principles Study

Tao Hu<sup>1#</sup>, Changhe Wu<sup>1#</sup>, Mingjun Li<sup>1</sup>, Xin Luo<sup>1</sup>, Yihao Hou<sup>1</sup>, Shichang Li<sup>1, 2</sup>, Shengnan Duan<sup>1</sup>, Dengfeng Li<sup>1, 2, a)</sup>, Gang Tang<sup>3, a)</sup>, and Chunbao Feng<sup>1, 2, a)</sup>

#### AFFILIATIONS

<sup>1</sup>*School of Science, Chongqing University of Posts and Telecommunications, Chongqing 400065, China*

<sup>2</sup>*Institute for Advanced Sciences, Chongqing University of Posts and Telecommunications, Chongqing 400065, China*

<sup>3</sup>*Advanced Research Institute of Multidisciplinary Science, Beijing Institute of Technology, Beijing 100081, China*

<sup>a)</sup>Correspondence and requests for materials should be addressed to: [lidf@cqupt.edu.cn](mailto:lidf@cqupt.edu.cn) (D. L.), [gtang@bit.edu.cn](mailto:gtang@bit.edu.cn) (G. T.) and [fengcb@cqupt.edu.cn](mailto:fengcb@cqupt.edu.cn) (C. B. F)

<sup>#</sup>These authors contributed equally.

## Mechanical properties

The elastic constants were calculated using VASP with the settings IBRION = 6, ISIF = 3, and NFREE = 2. The elastic tensor ( $C_{ij}$ ) is determined by performing six finite distortions of the lattice and deriving the elastic constants from the strain-stress relationship.<sup>1</sup>

Based on the calculated  $C_{ij}$ , the mechanical properties, including the bulk modulus ( $B$ ), shear modulus ( $G$ ), and Young's modulus ( $Y$ ), were determined using the Voigt-Reuss-Hill (VRH) approximation<sup>2, 3</sup>. For the cubic structure, considering its crystal symmetries, the values of  $B$ ,  $G$ , and  $Y$  are calculated as follows:<sup>4, 5</sup>

$$B = \frac{C_{11} + 2C_{12}}{3} \quad (1)$$

$$G = \frac{C_{11} - C_{12} + 3C_{44}}{5} \quad (2)$$

$$Y = \frac{9BG}{3B + G} \quad (3)$$

As shown in Table S2, both the  $C_{ij}$  values and the mechanical moduli follow the trend  $\text{Mg}_3\text{AsCl}_3 > \text{Ca}_3\text{AsCl}_3 > \text{Sr}_3\text{AsCl}_3 > \text{Ba}_3\text{AsCl}_3$ . This trend is attributed to the increasing ionic radii of the divalent cations:  $r(\text{Mg}^{2+}) < r(\text{Ca}^{2+}) < r(\text{Sr}^{2+}) < r(\text{Ba}^{2+})$ . Larger ionic radii lead to longer bond lengths, resulting in lower  $C_{ij}$  values and mechanical moduli. Since hydrostatic pressure reduces bond lengths, the  $C_{ij}$  values and mechanical moduli for all four compounds increase with increasing pressure. Moreover,  $\text{X}_3\text{AsCl}_3$  ( $\text{X}^{2+} = \text{Mg}, \text{Ca}, \text{Sr}, \text{Ba}$ ) exhibit Young's moduli ranging from 39 to 81 GPa at 0 GPa, which are higher than those of organic-inorganic hybrid halide perovskites (17 - 22 GPa),<sup>5</sup> but significantly lower than those of inorganic antiperovskites (90 - 182 GPa).<sup>6</sup>

## Murnaghan EOS equation

The Murnaghan EOS model assumes that the bulk modulus varies linearly with pressure. The resulting energy-volume relationship is given as:<sup>7</sup>

$$E(v) = E_0 + \frac{BV_0}{B' + 1} \left( \frac{v^{-B'} - 1}{B'} + v - 1 \right) \quad (4)$$

where  $v = \frac{V}{V_0}$ ,  $V_0$  and  $E_0$  are the volume and energy at zero pressure respectively.  $B$  and  $B'$  are the values of modules and its pressure derivative respectively.  $B_0$  and  $B'_0$  represent the bulk modulus and its pressure derivative at 0 GPa and can be determined by setting  $v = 1$  in the above equation.

### Optical properties

The optical absorption spectra of  $Mg_3AsCl_3$ ,  $Ca_3AsCl_3$ ,  $Sr_3AsCl_3$  and  $Ba_3AsCl_3$  are described by the complex dielectric function, i.e.  $\varepsilon(\omega) = \varepsilon_1(\omega) + i\varepsilon_2(\omega)$ . Based on the dielectric function of investigated systems, the absorption coefficient  $\alpha(\omega)$  can be given by the following equation:

$$\alpha(\omega) = \frac{\sqrt{2}\omega}{c} \left( \sqrt{\varepsilon_1^2 - \varepsilon_2^2} - \varepsilon_1 \right)^{\frac{1}{2}} \quad (5)$$

where  $\varepsilon_1(\omega)$  is the real part of the dielectric function,  $\varepsilon_2(\omega)$  is the imaginary part, and  $\omega$  is the optical frequency.<sup>8</sup>

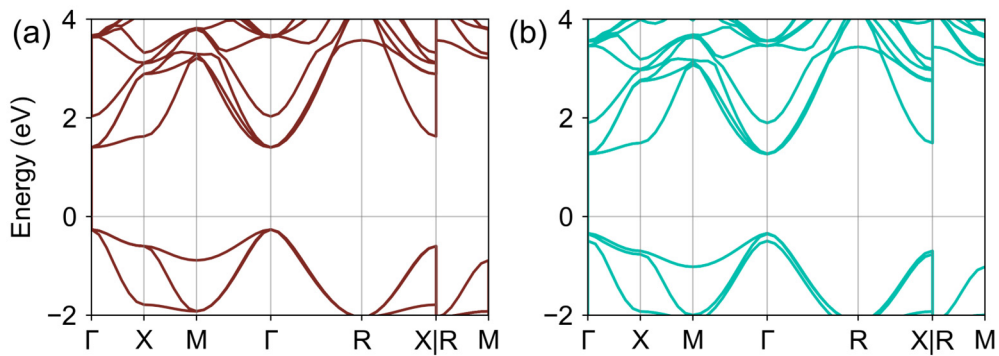

Figure S1. Band structure of  $\text{Ba}_3\text{AsCl}_3$  calculated using (a) HSE06 and (b) HSE06+SOC.

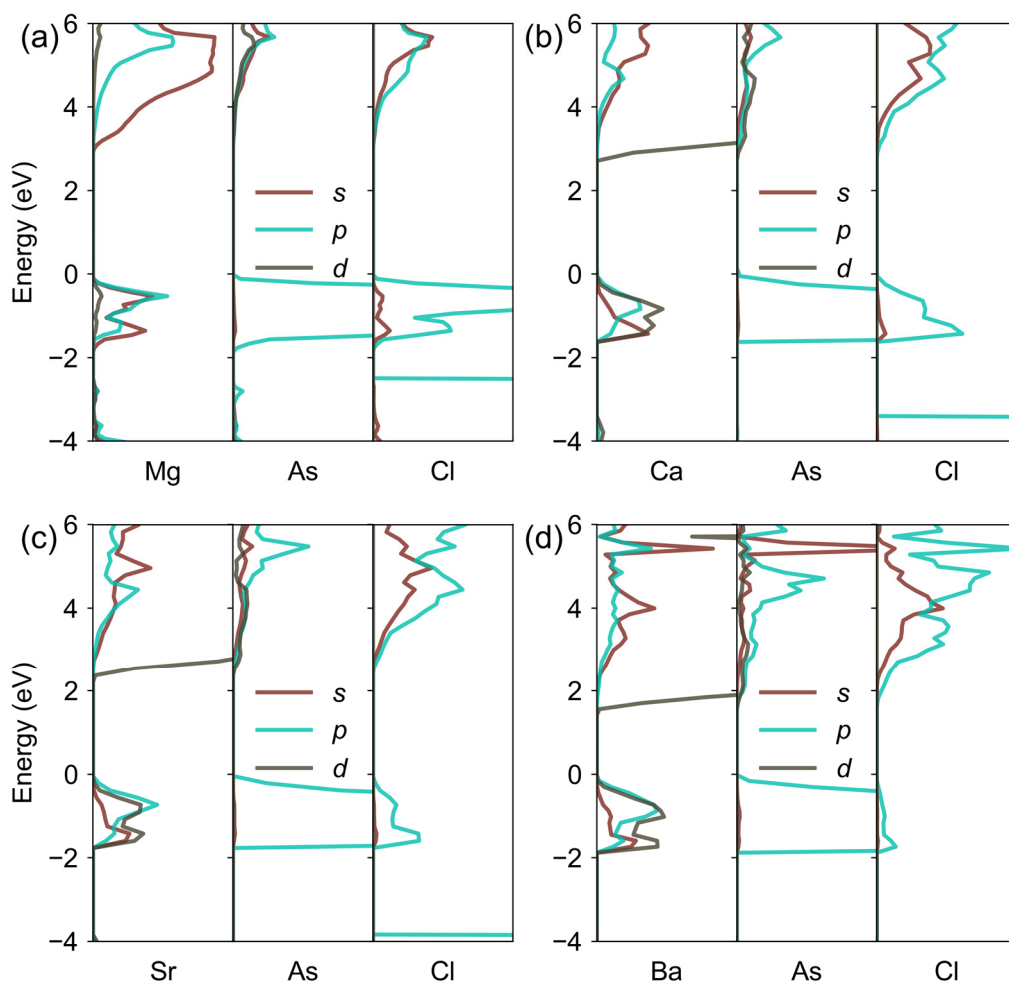

Figure S2. PDOS for (a)  $\text{Mg}_3\text{AsCl}_3$ , (b)  $\text{Ca}_3\text{AsCl}_3$ , (c)  $\text{Sr}_3\text{AsCl}_3$ , and (d)  $\text{Ba}_3\text{AsCl}_3$ .

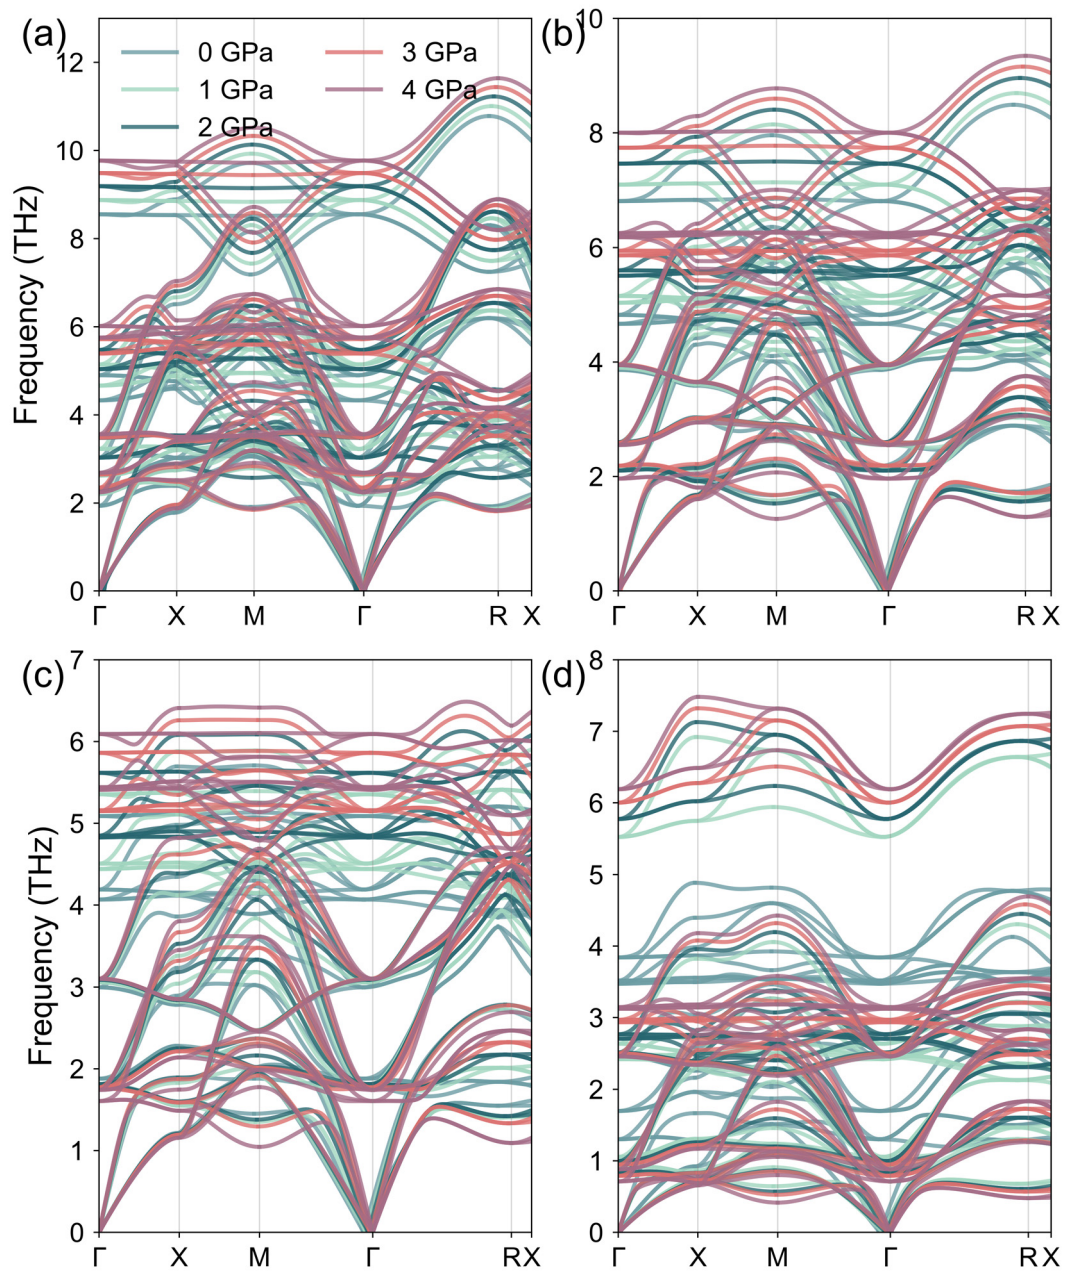

Figure S3. Phonon spectra under pressure for (a)  $\text{Mg}_3\text{AsCl}_3$ , (b)  $\text{Ca}_3\text{AsCl}_3$ , (c)  $\text{Sr}_3\text{AsCl}_3$ , and (d)  $\text{Ba}_3\text{AsCl}_3$ .

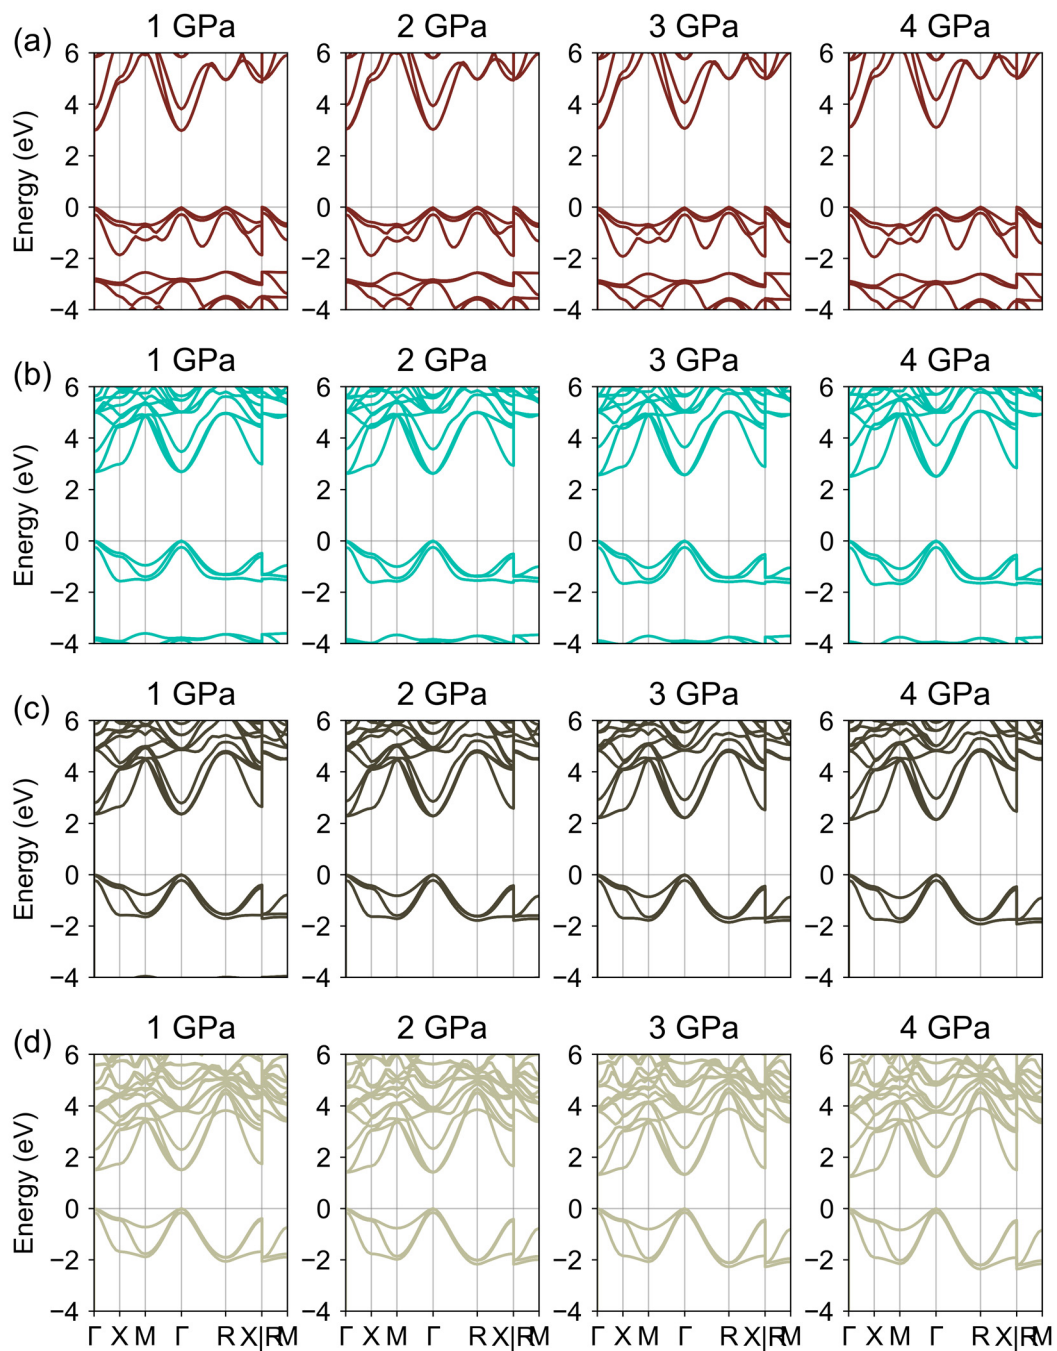

Figure S4. Band structure (aligned to the VBM) under pressures of 1 to 4 GPa, calculated with HSE06+SOC for (a)  $\text{Mg}_3\text{AsCl}_3$ , (b)  $\text{Ca}_3\text{AsCl}_3$ , (c)  $\text{Sr}_3\text{AsCl}_3$ , and (d)  $\text{Ba}_3\text{AsCl}_3$ .

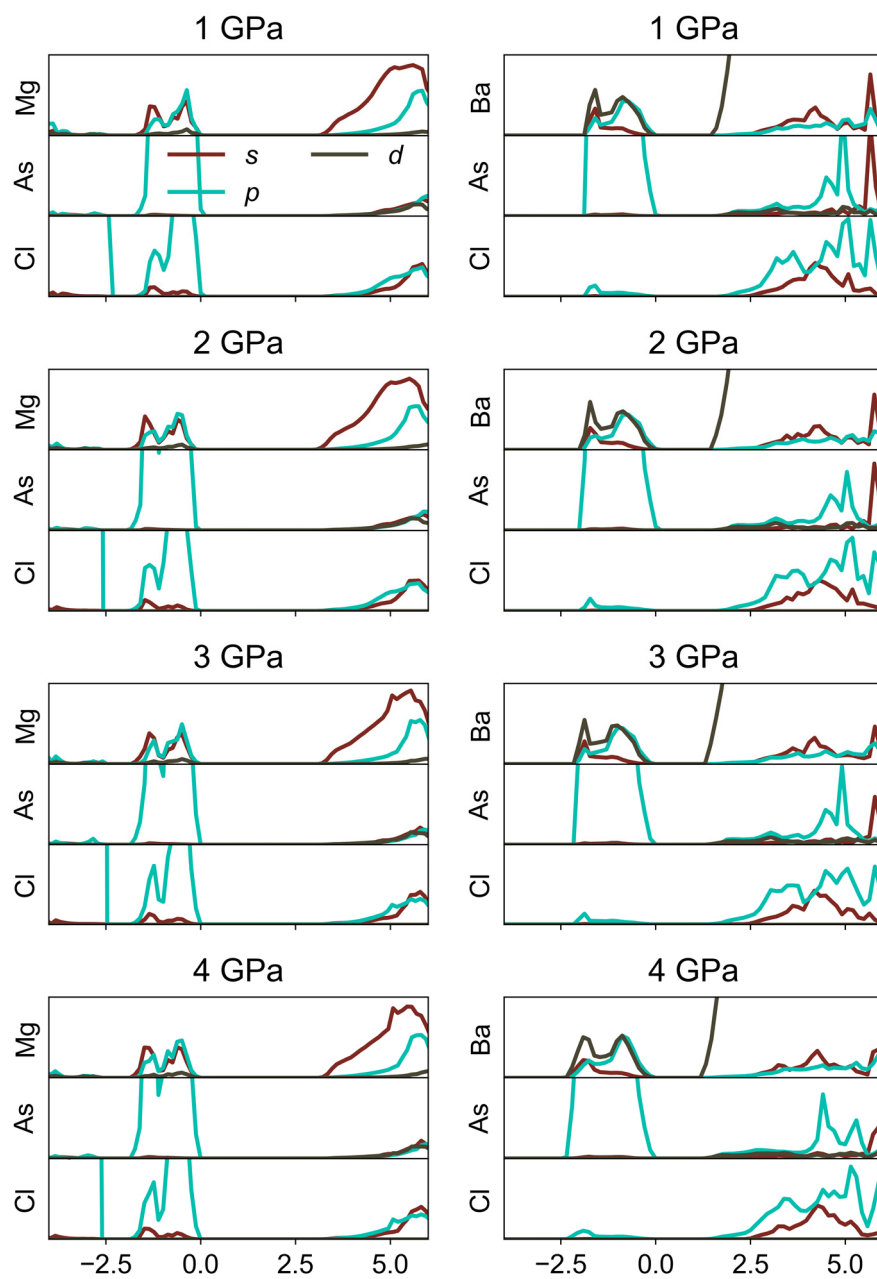

Figure S5. Projected density of states (PDOS) of  $\text{Mg}_3\text{AsCl}_3$  (left panel) and  $\text{Ba}_3\text{AsCl}_3$  (right panel) under pressures from 1 GPa to 4 GPa.

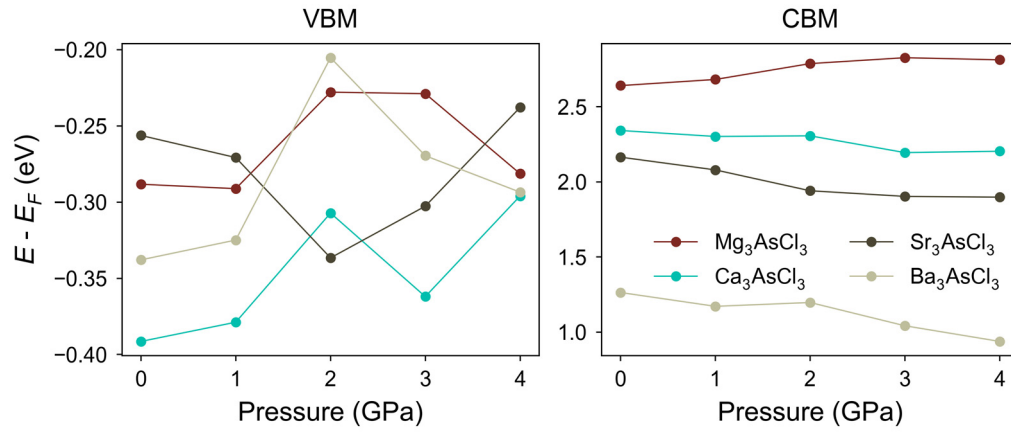

Figure S6. Changes in the VBM and CBM for  $Mg_3AsCl_3$ ,  $Ca_3AsCl_3$ ,  $Sr_3AsCl_3$ , and  $Ba_3AsCl_3$  under pressures ranging from 1 GPa to 4 GPa.



**Table S1.** The ionic ( $\epsilon_{\text{ion}}$ ) and electronic ( $\epsilon_{\omega}$ ) contributions to the static dielectric constant ( $\epsilon_{\text{st}}$ ) for  $\text{X}_3\text{AsCl}_3$  (X=Mg, Ca, Sr, Ba) under different pressure.

| Compound                   | Pressure (GPa) | $\epsilon^{\text{xx}}_{\text{ion}}$ | $\epsilon^{\text{yy}}_{\text{ion}}$ | $\epsilon^{\text{zz}}_{\text{ion}}$ | $\epsilon^{\text{xx}}_{\omega}$ | $\epsilon^{\text{yy}}_{\omega}$ | $\epsilon^{\text{zz}}_{\omega}$ | $\epsilon^{\text{xx}}_{\text{st}}$ | $\epsilon^{\text{yy}}_{\text{st}}$ | $\epsilon^{\text{zz}}_{\text{st}}$ |
|----------------------------|----------------|-------------------------------------|-------------------------------------|-------------------------------------|---------------------------------|---------------------------------|---------------------------------|------------------------------------|------------------------------------|------------------------------------|
| $\text{Mg}_3\text{AsCl}_3$ | 0              | 18.294                              | 18.294                              | 18.294                              | 4.665                           | 4.665                           | 4.665                           | 22.959                             | 22.959                             | 22.959                             |
|                            | 1              | 15.137                              | 15.137                              | 15.137                              | 4.652                           | 4.652                           | 4.652                           | 19.789                             | 19.789                             | 19.789                             |
|                            | 2              | 12.694                              | 12.694                              | 12.694                              | 4.643                           | 4.643                           | 4.643                           | 17.337                             | 17.337                             | 17.337                             |
|                            | 3              | 11.248                              | 11.248                              | 11.248                              | 4.630                           | 4.630                           | 4.630                           | 15.878                             | 15.878                             | 15.878                             |
|                            | 4              | 10.114                              | 10.114                              | 10.114                              | 4.627                           | 4.627                           | 4.627                           | 14.741                             | 14.741                             | 14.741                             |
| $\text{Ca}_3\text{AsCl}_3$ | 0              | 6.877                               | 6.877                               | 6.877                               | 4.462                           | 4.462                           | 4.462                           | 11.339                             | 11.339                             | 11.339                             |
|                            | 1              | 6.166                               | 6.166                               | 6.166                               | 4.521                           | 4.521                           | 4.521                           | 10.687                             | 10.687                             | 10.687                             |
|                            | 2              | 5.573                               | 5.573                               | 5.573                               | 4.600                           | 4.600                           | 4.600                           | 10.173                             | 10.173                             | 10.173                             |
|                            | 3              | 5.271                               | 5.271                               | 5.271                               | 4.671                           | 4.671                           | 4.671                           | 9.942                              | 9.942                              | 9.942                              |
|                            | 4              | 5.027                               | 5.027                               | 5.027                               | 4.744                           | 4.744                           | 4.744                           | 9.771                              | 9.771                              | 9.771                              |
| $\text{Sr}_3\text{AsCl}_3$ | 0              | 6.265                               | 6.265                               | 6.265                               | 4.254                           | 4.254                           | 4.254                           | 10.519                             | 10.519                             | 10.519                             |
|                            | 1              | 5.657                               | 5.657                               | 5.657                               | 4.329                           | 4.329                           | 4.329                           | 9.986                              | 9.986                              | 9.986                              |
|                            | 2              | 5.241                               | 5.241                               | 5.241                               | 4.411                           | 4.411                           | 4.411                           | 9.652                              | 9.652                              | 9.652                              |
|                            | 3              | 4.975                               | 4.975                               | 4.975                               | 4.499                           | 4.499                           | 4.499                           | 9.474                              | 9.474                              | 9.474                              |
|                            | 4              | 4.809                               | 4.809                               | 4.809                               | 4.593                           | 4.593                           | 4.593                           | 9.402                              | 9.402                              | 9.402                              |
| $\text{Ba}_3\text{AsCl}_3$ | 0              | 8.624                               | 8.624                               | 8.624                               | 4.930                           | 4.930                           | 4.930                           | 13.554                             | 13.554                             | 13.554                             |
|                            | 1              | 7.835                               | 7.835                               | 7.835                               | 5.231                           | 5.231                           | 5.231                           | 13.066                             | 13.066                             | 13.066                             |
|                            | 2              | 7.633                               | 7.633                               | 7.633                               | 5.585                           | 5.585                           | 5.585                           | 13.218                             | 13.218                             | 13.218                             |
|                            | 3              | 7.809                               | 7.809                               | 7.809                               | 6.043                           | 6.043                           | 6.043                           | 13.852                             | 13.852                             | 13.852                             |
|                            | 4              | 7.563                               | 7.563                               | 7.563                               | 6.172                           | 6.172                           | 6.172                           | 13.735                             | 13.735                             | 13.735                             |

**Table S2.** The elastic constants ( $C_{ij}$ ), bulk modulus ( $B$ ) shear modulus ( $G$ ) and Young's modulus ( $Y$ ), for  $X_3AsCl_3$  ( $X=Mg, Ca, Sr, Ba$ ) under different pressure.

| Compound                          | Pressure (GPa) | $C_{ij}$ (GPa) |          |          | $B_{VRH}$<br>(GPa) | $G_{VRH}$<br>(GPa) | $Y_{VRH}$<br>(GPa) |
|-----------------------------------|----------------|----------------|----------|----------|--------------------|--------------------|--------------------|
|                                   |                | $C_{11}$       | $C_{12}$ | $C_{44}$ |                    |                    |                    |
| Mg <sub>3</sub> AsCl <sub>3</sub> | 0              | 95.478         | 27.159   | 31.726   | 49.932             | 32.678             | 80.477             |
|                                   | 1              | 102.609        | 27.563   | 32.326   | 52.578             | 34.314             | 84.548             |
|                                   | 2              | 110.198        | 28.272   | 32.904   | 55.581             | 35.921             | 88.662             |
|                                   | 3              | 117.860        | 28.995   | 33.099   | 58.616             | 37.246             | 92.209             |
|                                   | 4              | 125.381        | 29.661   | 33.760   | 61.568             | 38.835             | 96.265             |
| Ca <sub>3</sub> AsCl <sub>3</sub> | 0              | 85.882         | 13.256   | 19.572   | 37.465             | 25.133             | 61.620             |
|                                   | 1              | 94.088         | 13.358   | 19.731   | 40.268             | 26.393             | 64.983             |
|                                   | 2              | 104.669        | 13.409   | 19.808   | 43.829             | 27.870             | 68.988             |
|                                   | 3              | 113.504        | 13.416   | 19.888   | 46.779             | 29.078             | 72.260             |
|                                   | 4              | 122.388        | 13.422   | 19.737   | 49.744             | 30.066             | 75.072             |
| Sr <sub>3</sub> AsCl <sub>3</sub> | 0              | 75.869         | 9.995    | 15.141   | 31.953             | 20.788             | 51.249             |
|                                   | 1              | 85.108         | 10.092   | 15.053   | 35.098             | 21.914             | 54.416             |
|                                   | 2              | 94.592         | 10.085   | 14.904   | 38.254             | 22.977             | 57.432             |
|                                   | 3              | 103.893        | 10.069   | 14.714   | 41.344             | 23.937             | 60.195             |
|                                   | 4              | 113.102        | 10.006   | 14.489   | 44.371             | 24.825             | 62.768             |
| Ba <sub>3</sub> AsCl <sub>3</sub> | 0              | 63.166         | 8.343    | 10.938   | 26.617             | 15.964             | 39.912             |
|                                   | 1              | 74.077         | 8.362    | 10.620   | 30.267             | 17.039             | 43.040             |
|                                   | 2              | 83.993         | 8.484    | 10.044   | 33.653             | 17.673             | 45.121             |
|                                   | 3              | 93.294         | 8.359    | 9.550    | 36.670             | 18.280             | 47.025             |

**Table S3. Lattice constants, HSE06+SOC Band gap ( $E_g$ , with I for indirect and D for direct bandgap), ionic ( $\epsilon_{ion}$ ) and electronic ( $\epsilon_{\infty}$ ) dielectric constant, average effective mass of hole ( $m_h^*$ ) and electron ( $m_e^*$ ), Exciton Binding Energy ( $E_b$ ), and Spectroscopic Limited Maximum Efficiency (SLME) at 2  $\mu\text{m}$  film thickness for  $\text{Mg}_3\text{AsCl}_3$ ,  $\text{Ca}_3\text{AsCl}_3$ ,  $\text{Sr}_3\text{AsCl}_3$ , and  $\text{Ba}_3\text{AsCl}_3$  under varying pressures.**

| Compounds                  | Pressure (GPa) | a ( $\text{\AA}$ )         | $E_g$ (eV)                     | $\epsilon_{ion}$ | $\epsilon_{\infty}$ | $m_h^*$ ( $m_0$ ) | $m_e^*$ ( $m_0$ ) | $E_b$ (eV) | SLME (%) |
|----------------------------|----------------|----------------------------|--------------------------------|------------------|---------------------|-------------------|-------------------|------------|----------|
| $\text{Mg}_3\text{AsCl}_3$ | 0              | 5.32,<br>5.32 <sup>9</sup> | 2.93 (I),<br>3.00 <sup>9</sup> | 18.294           | 4.665               | 0.388             | 0.375             | 0.119      | 4.77     |
|                            | 1              | 5.288                      | 2.97 (I)                       | 15.137           | 4.652               | 0.383             | 0.372             | 0.118      | 4.18     |
|                            | 2              | 5.256                      | 3.01(I)                        | 12.694           | 4.643               | 0.380             | 0.370             | 0.118      | 3.68     |
|                            | 3              | 5.227                      | 3.06(I)                        | 11.248           | 4.630               | 0.376             | 0.367             | 0.117      | 3.22     |
|                            | 4              | 5.200                      | 3.09 (I)                       | 10.114           | 4.627               | 0.373             | 0.366             | 0.117      | 3.01     |
| $\text{Ca}_3\text{AsCl}_3$ | 0              | 5.79,<br>5.80 <sup>9</sup> | 2.73 (D),<br>2.84 <sup>9</sup> | 6.877            | 4.462               | 0.389             | 0.539             | 0.154      | 7.89     |
|                            | 1              | 5.743                      | 2.68 (D)                       | 6.166            | 4.521               | 0.378             | 0.506             | 0.144      | 8.72     |
|                            | 2              | 5.692                      | 2.61 (D)                       | 5.573            | 4.600               | 0.366             | 0.482             | 0.133      | 9.95     |
|                            | 3              | 5.652                      | 2.56 (D)                       | 5.271            | 4.671               | 0.356             | 0.463             | 0.125      | 10.97    |
|                            | 4              | 5.615                      | 2.50(D)                        | 5.027            | 4.744               | 0.345             | 0.446             | 0.117      | 12.01    |
| $\text{Sr}_3\text{AsCl}_3$ | 0              | 6.12,<br>6.12 <sup>9</sup> | 2.42 (D),<br>2.47 <sup>9</sup> | 6.265            | 4.254               | 0.398             | 0.524             | 0.169      | 13.62    |
|                            | 1              | 6.064                      | 2.35 (D)                       | 5.657            | 4.329               | 0.384             | 0.504             | 0.158      | 15.02    |
|                            | 2              | 6.011                      | 2.28(D)                        | 5.241            | 4.411               | 0.370             | 0.483             | 0.146      | 16.40    |
|                            | 3              | 5.963                      | 2.21(D)                        | 4.975            | 4.499               | 0.357             | 0.464             | 0.135      | 17.83    |
|                            | 4              | 5.919                      | 2.14(D)                        | 4.809            | 4.593               | 0.345             | 0.445             | 0.125      | 19.31    |
| $\text{Ba}_3\text{AsCl}_3$ | 0              | 6.51,<br>6.51 <sup>9</sup> | 1.60 (D),<br>1.62 <sup>9</sup> | 8.624            | 4.930               | 0.363             | 0.522             | 0.119      | 29.58    |

---

|   |       |          |       |       |       |       |       |       |
|---|-------|----------|-------|-------|-------|-------|-------|-------|
| 1 | 6.429 | 1.50 (D) | 7.835 | 5.231 | 0.341 | 0.482 | 0.099 | 31.14 |
| 2 | 6.363 | 1.40 (D) | 7.633 | 5.585 | 0.321 | 0.453 | 0.082 | 32.29 |
| 3 | 6.306 | 1.31 (D) | 7.809 | 6.043 | 0.303 | 0.426 | 0.066 | 32.41 |
| 4 | 6.259 | 1.23 (D) | 7.563 | 6.172 | 0.288 | 0.403 | 0.060 | 31.94 |

---

---

**Table S4. Band index and corresponding Mulliken symbols and Koster notation for  $O_h$  and  $D_{4h}$  point groups.**

| K                                 |     | $\Gamma (0.0\ 0.0\ 0.0)$ |                 |              | $X (0.0\ 0.5\ 0.0)$ |                 |          | $M (0.5\ 0.5\ 0.0)$ |                 |          | $R (0.5\ 0.5\ 0.5)$ |                 |          |
|-----------------------------------|-----|--------------------------|-----------------|--------------|---------------------|-----------------|----------|---------------------|-----------------|----------|---------------------|-----------------|----------|
|                                   |     | $O_h$                    |                 |              | $D_{4h}$            |                 |          | $D_{4h}$            |                 |          | $O_h$               |                 |          |
| Symmetry                          |     | Band                     | Mulliken        | Koster       | Band                | Mulliken        | Koster   | Band                | Mulliken        | Koster   | Band                | Mulliken        | Koster   |
|                                   |     | Index                    | Symbol          | Notation     | Index               | Symbol          | Notation | Index               | Symbol          | Notation | Index               | Symbol          | Notation |
| Mg <sub>3</sub> AsCl <sub>3</sub> | CBM | 3                        | E <sub>g</sub>  | $\Gamma_3^+$ | 9                   | B <sub>2u</sub> | $X_4^-$  | 1                   | A <sub>1g</sub> | $M_1^+$  | 9                   | T <sub>1u</sub> | $R_4^-$  |
|                                   | VBM | 9                        | T <sub>1u</sub> | $\Gamma_4^-$ | 5                   | E <sub>g</sub>  | $X_5^+$  | 10                  | E <sub>u</sub>  | $M_5^-$  | 5                   | T <sub>2g</sub> | $R_5^+$  |
| Ca <sub>3</sub> AsCl <sub>3</sub> | CBM | 5                        | T <sub>2g</sub> | $\Gamma_5^+$ | 8                   | B <sub>1u</sub> | $X_3^-$  | 7                   | A <sub>2u</sub> | $M_2^-$  | 9                   | T <sub>1u</sub> | $R_4^-$  |
|                                   | VBM | 9                        | T <sub>1u</sub> | $\Gamma_4^-$ | 5                   | E <sub>g</sub>  | $X_5^+$  | 8                   | B <sub>1u</sub> | $M_3^-$  | 5                   | T <sub>2g</sub> | $R_5^+$  |
| Sr <sub>3</sub> AsCl <sub>3</sub> | CBM | 5                        | T <sub>2g</sub> | $\Gamma_5^+$ | 8                   | B <sub>1u</sub> | $X_3^-$  | 7                   | A <sub>2u</sub> | $M_2^-$  | 9                   | T <sub>1u</sub> | $R_4^-$  |
|                                   | VBM | 9                        | T <sub>1u</sub> | $\Gamma_4^-$ | 5                   | E <sub>g</sub>  | $X_5^+$  | 8                   | B <sub>1u</sub> | $M_3^-$  | 5                   | T <sub>2g</sub> | $R_5^+$  |
| Ba <sub>3</sub> AsCl <sub>3</sub> | CBM | 5                        | T <sub>2g</sub> | $\Gamma_5^+$ | 8                   | B <sub>1u</sub> | $X_3^-$  | 7                   | A <sub>2u</sub> | $M_2^-$  | 1                   | A <sub>1g</sub> | $R_1^+$  |
|                                   | VBM | 9                        | T <sub>1u</sub> | $\Gamma_4^-$ | 5                   | E <sub>g</sub>  | $X_5^+$  | 8                   | B <sub>1u</sub> | $M_3^-$  | 5                   | T <sub>2g</sub> | $R_5^+$  |

## REFERENCES

1. Y. Le Page and P. Saxe, *Physical Review B*, 2002, **65**, 104104.
2. Z.-j. Wu, E.-j. Zhao, H.-p. Xiang, X.-f. Hao, X.-j. Liu and J. Meng, *Physical Review B*, 2007, **76**, 054115.
3. R. Hill, *Proceedings of the Physical Society. Section A*, 1952, **65**, 349.
4. P. Ravindran, L. Fast, P. A. Korzhavyi, B. Johansson, J. Wills and O. Eriksson, *Journal of Applied Physics*, 1998, **84**, 4891–4904.
5. M. Faghihnasiri, M. Izadifard and M. E. Ghazi, *The Journal of Physical Chemistry C*, 2017, **121**, 27059-27070.
6. H. Zhong, C. Feng, H. Wang, D. Han, G. Yu, W. Xiong, Y. Li, M. Yang, G. Tang and S. Yuan, *ACS Applied Materials & Interfaces*, 2021, **13**, 48516-48524.
7. K. Latimer, S. Dwaraknath, K. Mathew, D. Winston and K. A. Persson, *npj Computational Materials*, 2018, **4**, 40.
8. V. Wang, N. Xu, J.-C. Liu, G. Tang and W.-T. Geng, *Computer Physics Communications*, 2021, **267**, 108033.
9. H.-J. Feng and Q. Zhang, *Applied Physics Letters*, 2021, **118**.
